# Supplementary material for: Water limitations on forest carbon cycling and conifer traits along a steep climatic gradient in the Cascade Mountains, Oregon
Source: Copernicus journal article supplement (doi:10.5194/bg-12-6617-2015), 2015-11-19
Supplement: Supplementary file 2 [file bg-12-6617-2015-supplement.zip]

1 *Supplemental material for*

2 Berner, L. T., and B. E. Law (2015), Water limitations on forest carbon cycling and conifer traits along a steep climatic gradient in the Cascade  
3 Mountains, Oregon, *Biogeosciences*, 12(22), 6617-6635, doi:10.5194/bg-12-6617-2015.

4

5 **Table S1.** Key describing variable names, abbreviations, and units.

| Category                     | Variable                                                 | Abbreviation                | Units                                        |
|------------------------------|----------------------------------------------------------|-----------------------------|----------------------------------------------|
| Forest structure             | aboveground biomass in living trees                      | AGB                         | kg C m <sup>-2</sup>                         |
|                              | half-total surface leaf area                             | LAI                         | m <sup>2</sup> leaf m <sup>-2</sup>          |
| Forest growth                | aboveground net primary productivity                     | ANPP                        | kg C m <sup>-2</sup> yr <sup>-1</sup>        |
|                              | annual ring-width index                                  | RWI                         | unitless                                     |
| Tree characteristics         | diameter at breast height                                | DBH                         | cm                                           |
|                              | Height                                                   | H                           | M                                            |
|                              | stem wood density                                        | WD                          | g DM cm <sup>-3</sup>                        |
|                              | stem wood density (ecosystem-average)                    | $\overline{WD}$             | g DM cm <sup>-3</sup>                        |
|                              | specific leaf area                                       | SLA                         | cm <sup>2</sup> HSA g <sup>-1</sup> C        |
|                              | leaf:sapwood area ratio                                  | LA:SA                       | m <sup>2</sup> leaf cm <sup>-2</sup> sapwood |
|                              | leaf longevity                                           | LL                          | years                                        |
|                              | leaf carbon                                              | C                           | % of dry weight                              |
|                              | leaf nitrogen                                            | N                           | % of dry weight                              |
| Climate (monthly)            | average, max, min temperature                            | $T_{avg}, T_{min}, T_{max}$ | °C                                           |
|                              | daily temperature range                                  | $T_{rng}$                   | °C                                           |
|                              | daily mean extraterrestrial radiation                    | $R$                         | MJ m <sup>-2</sup> day <sup>-1</sup>         |
|                              | reference evapotranspiration                             | $ET_0$                      | mm month <sup>-1</sup>                       |
|                              | precipitation (rain + snow)                              | $PPT$                       | mm month <sup>-1</sup>                       |
|                              | climate moisture index ( $PPT-ET_0$ )                    | $CMI$                       | mm month <sup>-1</sup>                       |
|                              | standardized precipitation evapotranspiration index      | $SPEI$                      | unitless                                     |
|                              | e.g. $CMI$ summed Oct. through Sept.                     | $CMI_{gy}$                  | mm year <sup>-1</sup>                        |
| Climate (50-year average)    | e.g. $CMI_{gy}$ averaged annually 1964-2013              | $CMI_{\overline{gy}}$       | mm year <sup>-1</sup>                        |
| Tree growth-climate response | ecosystem-average RWI- $CMI$ correlation                 | $\bar{r}_{RWI-CMI}$         | r                                            |
|                              | % trees with significant positive RWI- $CMI$ correlation | $F_{RWI-CMI}$               | %                                            |

6

7

**Table S2.** Location and forest characteristics of 12 field sites located in the eastern Cascade Mountains, Oregon. Forest characteristics include aboveground live biomass (AGB), annual aboveground net primary productivity (ANPP), leaf area index (LAI), sapwood area, leaf:sapwood area ratio (LA:SA), maximum tree height ( $H_{\max}$ ), and ecosystem-average stem wood density (WD), leaf longevity (LL), specific leaf area (SLA), leaf carbon (C) and leaf nitrogen (N). Characteristics were averaged ( $\pm$  SE) across four subplots per plot. Stand age was calculated as the average age of the oldest 10% of trees. Sites were sampled during the summer of 2014.

| Forest type     | Plot                     | Lat.   | Long.    | Elev.<br>(m) | Trees<br>per ha | Stand<br>Age<br>(yrs) | AGB<br>(kg C m <sup>-2</sup> ) | ANPP<br>(g C m <sup>-2</sup> yr <sup>-1</sup> ) | LAI<br>(m <sup>2</sup> m <sup>-2</sup> ) | Sapwood<br>(cm <sup>2</sup> m <sup>-2</sup> ) | LA:SA<br>(m <sup>2</sup> cm <sup>-2</sup> ) | $H_{\max}$<br>(m) | WD<br>(g cm <sup>-3</sup> ) | LL<br>(yrs)      | SLA<br>(cm <sup>2</sup> g<br>C <sup>-1</sup> ) | C<br>(%)        | N<br>(%)        |
|-----------------|--------------------------|--------|----------|--------------|-----------------|-----------------------|--------------------------------|-------------------------------------------------|------------------------------------------|-----------------------------------------------|---------------------------------------------|-------------------|-----------------------------|------------------|------------------------------------------------|-----------------|-----------------|
| western juniper | 1                        | 44.203 | -121.368 | 1007         | 99 $\pm$ 26     | 148                   | 1.95 $\pm$ 0.73                | 17 $\pm$ 2                                      | 0.24 $\pm$ 0.06                          | 3.8 $\pm$ 1.4                                 | 0.06 $\pm$ 0.03                             | 10.6 $\pm$ 1.0    | 0.48 $\pm$ 0.03             | 5.6 <sup>c</sup> | 62 $\pm$ 1                                     | 48.3 $\pm$ 0.2  | 0.94 $\pm$ 0.02 |
|                 | 2                        | 44.247 | -121.433 | 958          | 157 $\pm$ 16    | 537                   | 2.99 $\pm$ 0.87                | 21 $\pm$ 2                                      | 0.37 $\pm$ 0.05                          | 6.4 $\pm$ 1.7                                 | 0.06 $\pm$ 0.02                             | 9.9 $\pm$ 0.3     | 0.44 $\pm$ 0.01             | 5.6 <sup>c</sup> | 66 $\pm$ 3                                     | 48.0 $\pm$ 0.2  | 0.91 $\pm$ 0.02 |
|                 | 3                        | 44.297 | -121.333 | 929          | 113 $\pm$ 24    | 253                   | 2.67 $\pm$ 0.86                | 11 $\pm$ 2                                      | 0.09 $\pm$ 0.03                          | 5.2 $\pm$ 1.6                                 | 0.02 $\pm$ 0.01                             | 10.5 $\pm$ 0.1    | 0.47 $\pm$ 0.02             | 5.6 <sup>c</sup> | 66 $\pm$ 2                                     | 48.3 $\pm$ 0.1  | 0.95 $\pm$ 0.03 |
|                 | 4 <sup>ab</sup>          | 44.311 | -121.327 | 908          | 85 $\pm$ 18     | 32                    | 0.21 $\pm$ 0.04                | 16 $\pm$ 3                                      | 0.32 $\pm$ 0.04                          | 1.2 $\pm$ 0.3                                 | 0.27 $\pm$ 0.07                             | 5.7 $\pm$ 0.7     | 0.52 $\pm$ 0.02             | 5.6 <sup>c</sup> | 72 $\pm$ 3.6                                   | 47.3 $\pm$ 0.2  | 1.45 $\pm$ 0.29 |
|                 | 5                        | 44.264 | -121.344 | 975          | 156 $\pm$ 19    | 119                   | 2.58 $\pm$ 0.49                | 19 $\pm$ 2                                      | 0.35 $\pm$ 0.09                          | 5.9 $\pm$ 1.0                                 | 0.06 $\pm$ 0.02                             | 11.2 $\pm$ 0.8    | 0.49 $\pm$ 0.02             | 5.6 <sup>c</sup> | 60 $\pm$ 2                                     | 48.2 $\pm$ 0.5  | 0.77 $\pm$ 0.02 |
| ponderosa pine  | 1                        | 44.326 | -121.674 | 1124         | 127 $\pm$ 20    | 327                   | 16.51 $\pm$ 2.73               | 145 $\pm$ 16                                    | 1.41 $\pm$ 0.17                          | 20.3 $\pm$ 2.8                                | 0.07 $\pm$ 0.01                             | 35.4 $\pm$ 0.5    | 0.46 $\pm$ 0.01             | 4.9 $\pm$ 0.2    | 96 $\pm$ 1                                     | 47.9 $\pm$ 0.1  | 1.17 $\pm$ 0.04 |
|                 | 2                        | 44.344 | -121.573 | 978          | 276 $\pm$ 74    | 190                   | 7.26 $\pm$ 1.47                | 125 $\pm$ 25                                    | 1.63 $\pm$ 0.09                          | 16.3 $\pm$ 3.6                                | 0.10 $\pm$ 0.02                             | 26.2 $\pm$ 1.0    | 0.42 $\pm$ 0.01             | 3.4 $\pm$ 0.1    | 94 $\pm$ 3                                     | 48.4 $\pm$ 0.1  | 1.11 $\pm$ 0.03 |
|                 | 3                        | 44.258 | -121.650 | 1315         | 251 $\pm$ 26    | 280                   | 10.03 $\pm$ 1.27               | 262 $\pm$ 8                                     | 2.58 $\pm$ 0.19                          | 18.4 $\pm$ 0.4                                | 0.14 $\pm$ 0.01                             | 27.1 $\pm$ 3.0    | 0.45 $\pm$ 0.01             | 4.9 $\pm$ 0.3    | 91 $\pm$ 6                                     | 48.2 $\pm$ 0.1  | 1.15 $\pm$ 0.04 |
|                 | 4 (US-Me6) <sup>bc</sup> | 44.323 | -121.605 | 996          | 165 $\pm$ 26    | 23                    | 0.72 $\pm$ 0.06                | 77 $\pm$ 7                                      | 1.21 $\pm$ 0.09                          | 3.9 $\pm$ 0.5                                 | 0.31 $\pm$ 0.04                             | 8.43 $\pm$ 0.3    | 0.43 $\pm$ 0.01             | 4.8 $\pm$ 0.3    | 82 $\pm$ 3                                     | 48.9 $\pm$ 0.1  | 1.21 $\pm$ 0.04 |
|                 | 5 (US-Me2) <sup>d</sup>  | 44.451 | -121.558 | 1254         | 334 $\pm$ 36    | 106                   | 8.74 $\pm$ 0.68                | 210 $\pm$ 23                                    | 2.04 $\pm$ 0.21                          | 20.3 $\pm$ 1.6                                | 0.10 $\pm$ 0.01                             | 22.9 $\pm$ 0.7    | 0.44 $\pm$ 0.01             | 3.9 $\pm$ 0.3    | 82 $\pm$ 3                                     | 48.3 $\pm$ 0.1  | 1.05 $\pm$ 0.02 |
| grand fir       | 1                        | 44.232 | -121.670 | 1560         | 645 $\pm$ 77    | 114                   | 8.82 $\pm$ 1.64                | 205 $\pm$ 12                                    | 5.19 $\pm$ 0.29                          | 19.3 $\pm$ 1.8                                | 0.27 $\pm$ 0.03                             | 25.6 $\pm$ 3.1    | 0.39 $\pm$ 0.02             | 6.8 $\pm$ 0.3    | 100 $\pm$ 5                                    | 48.2 $\pm$ 0.1  | 0.80 $\pm$ 0.02 |
|                 | 2                        | 44.241 | -121.684 | 1519         | 597 $\pm$ 76    | 194                   | 21.60 $\pm$ 2.47               | 311 $\pm$ 60                                    | 6.15 $\pm$ 1.12                          | 31.4 $\pm$ 2.9                                | 0.20 $\pm$ 0.04                             | 35.0 $\pm$ 1.7    | 0.39 $\pm$ 0.02             | 9.0 $\pm$ 0.9    | 104 $\pm$ 10                                   | 47.9 $\pm$ 0.2  | 0.99 $\pm$ 0.03 |
|                 | 3 <sup>a</sup>           | 44.302 | -121.756 | 1429         | 613 $\pm$ 212   | 46                    | 11.30 $\pm$ 2.94               | 342 $\pm$ 83                                    | 5.39 $\pm$ 1.03                          | 22.1 $\pm$ 3.4                                | 0.24 $\pm$ 0.06                             | 25.6 $\pm$ 2.84   | 0.41 $\pm$ 0.01             | 7.49 $\pm$ 1.11  | 89 $\pm$ 5                                     | 48.3 $\pm$ 0.19 | 1.04 $\pm$ 0.73 |
|                 | 4                        | 44.302 | -121.702 | 1208         | 233 $\pm$ 72    | 82                    | 10.46 $\pm$ 0.68               | 190 $\pm$ 34                                    | 2.67 $\pm$ 0.16                          | 14.5 $\pm$ 1.8                                | 0.18 $\pm$ 0.03                             | 35.2 $\pm$ 2.4    | 0.42 $\pm$ 0.01             | 7.5 $\pm$ 1.1    | 99 $\pm$ 4                                     | 47.9 $\pm$ 0.2  | 0.90 $\pm$ 0.05 |
|                 | 5                        | 44.370 | -121.758 | 1292         | 205 $\pm$ 14    | 182                   | 16.89 $\pm$ 2.13               | 247 $\pm$ 18                                    | 4.16 $\pm$ 0.04                          | 20.8 $\pm$ 2.4                                | 0.20 $\pm$ 0.02                             | 38.5 $\pm$ 1.4    | 0.42 $\pm$ 0.01             | 7.7 $\pm$ 1.1    | 89 $\pm$ 3                                     | 48.0 $\pm$ 0.2  | 0.94 $\pm$ 0.10 |

<sup>a</sup> Young stands not included in the analysis.

<sup>b</sup> Western juniper leaf longevity was calculated as the ratio of foliage biomass to annual leaf fall using measurements from Runyon et al. (1994).

<sup>c</sup> AmeriFlux Metolius Young Pine Burn (US-Me6) flux tower. The stand was not mature and therefore was not included in the analysis.

<sup>d</sup> AmeriFlux Metolius Mature Pine (US-Me2) flux tower.

21 **Table S3.** Equations relating sapwood area (SA; cm<sup>2</sup>) to diameter at breast height (DBH; cm) for three conifer species in the eastern Cascade  
 22 Mountains, Oregon. Equations are of the form  $SA = aDBH^b$ , where a and b are fitted coefficients.

| Species         | a     | a (SE) | b     | b (SE) | r <sup>2</sup> | DF   | RMSE (cm <sup>2</sup> ) |
|-----------------|-------|--------|-------|--------|----------------|------|-------------------------|
| western juniper | 2.303 | 1.028  | 1.382 | 0.113  | 0.76           | 2,54 | 29.96                   |
| ponderosa pine  | 2.428 | 0.736  | 1.587 | 0.071  | 0.92           | 2,63 | 49.39                   |
| grand fir       | 1.153 | 0.517  | 1.676 | 0.113  | 0.85           | 2,49 | 34.69                   |

23  
 24  
 25  
 26  
 27  
 28  
 29  
 30  
 31  
 32  
 33  
 34  
 35  
 36

37 **Table S4.** Equations relating tree height (H; m) to diameter at breast height (DBH; cm) for three conifer species in the eastern Cascade Mountains,  
 38 Oregon. Equations are of the form  $H = 1.3 + e^{a + \frac{b}{DBH + c}}$ , where  $a$ ,  $b$ , and  $c$  are fitted coefficients.

| Species         | a     | a (SE) | b       | b (SE) | c     | c (SE) | r <sup>2</sup> | RMSE<br>(m) | n   |
|-----------------|-------|--------|---------|--------|-------|--------|----------------|-------------|-----|
| western juniper | 2.214 | 0.052  | -14.095 | 2.502  | 2.138 | 1.621  | 0.66           | 1.55        | 225 |
| ponderosa pine  | 4.015 | 0.054  | -50.696 | 5.154  | 7.738 | 2.253  | 0.86           | 3.12        | 378 |
| grand fir       | 4.081 | 0.079  | -49.431 | 6.333  | 8.495 | 2.327  | 0.87           | 3.21        | 340 |

**Table S5.** Average ( $\pm 1$  SD) growing-year climate conditions from 1964 to 2013 for sites dominated by western juniper, ponderosa pine, and grand fir in the eastern Cascade Mountains, Oregon. The growing-year extended from October of year  $t-1$  through September of year  $t$ . Climate variable include average daily temperature ( $T_{\overline{gy}}$ ), precipitation ( $PPT_{\overline{gy}}$ ), reference evapotranspiration ( $ET_{\overline{gy}}$ ) and climate moisture index ( $CMI_{\overline{gy}} = PPT_{\overline{gy}} - ET_{\overline{gy}}$  calculated from monthly PRISM climate data (Daly et al. 2008).

| Forest type     | Plot | $T_{\overline{gy}}$<br>(° C) | $PPT_{\overline{gy}}$<br>(mm yr <sup>-1</sup> ) | $ET_{\overline{gy}}$<br>(mm yr <sup>-1</sup> ) | $CMI_{\overline{gy}}$<br>(mm yr <sup>-1</sup> ) |
|-----------------|------|------------------------------|-------------------------------------------------|------------------------------------------------|-------------------------------------------------|
| western juniper | 1    | 8.3±0.8                      | 290±70                                          | 1530±70                                        | -1240±120                                       |
|                 | 2    | 8.0±0.8                      | 330±80                                          | 1530±70                                        | -1200±130                                       |
|                 | 3    | 8.6±0.8                      | 240±60                                          | 1570±70                                        | -1330±110                                       |
|                 | 5    | 8.4±0.8                      | 280±70                                          | 1510±60                                        | -1240±120                                       |
| ponderosa pine  | 1    | 7.0±0.7                      | 630±150                                         | 1470±70                                        | -840±200                                        |
|                 | 2    | 7.7±0.8                      | 430±110                                         | 1570±70                                        | -1140±160                                       |
|                 | 3    | 6.0±0.7                      | 760±190                                         | 1200±60                                        | -430±230                                        |
|                 | 5    | 6.9±0.7                      | 610±150                                         | 1190±60                                        | -580±190                                        |
| grand fir       | 1    | 6.7±0.8                      | 650±170                                         | 1290±60                                        | -640±210                                        |
|                 | 2    | 5.6±0.7                      | 960±220                                         | 1150±60                                        | -190±260                                        |
|                 | 4    | 6.3±0.7                      | 920±210                                         | 1250±70                                        | -330±250                                        |
|                 | 5    | 6.5±0.7                      | 1260±250                                        | 1210±70                                        | 50±290                                          |

**Table S6.** Summary of tree-ring width index (RWI) correlations with a variety of climate variables for three tree species in the eastern Cascade Mountains, Oregon. Correlations between RWI and the climate variables were computed for each individual tree (n=216), with climate data averaged (temperature-related variables) or summed (water-related variable) monthly at 1- to 36-month lags. The climate response for each tree was then summarized based on the average of the top 5% of correlations, regardless of the temporal response window. The climate response for each species was then evaluated both in terms of the percent of trees that exhibited a significant ( $P < 0.05$ ) positive or negative correlation with the climate variable of interest and as the average strength of the correlation.

| Climate variable | Units    | Species         | % of trees with sig. RWI-climate correlation |          |              |          | RWI-climate correlation (r) |      |      |              |      |      |
|------------------|----------|-----------------|----------------------------------------------|----------|--------------|----------|-----------------------------|------|------|--------------|------|------|
|                  |          |                 | 1964 to 2013                                 |          | 1994 to 2013 |          | 1964 to 2013                |      |      | 1994 to 2013 |      |      |
|                  |          |                 | negative                                     | positive | negative     | positive | mean                        | SD   | P    | mean         | SD   | P    |
| $T_{avg}$        | °C       | western juniper | 33.36                                        | 5.94     | 28.00        | 8.10     | -0.21                       | 0.13 | 0.19 | -0.25        | 0.17 | 0.23 |
|                  |          | ponderosa pine  | 24.89                                        | 5.59     | 19.95        | 4.30     | -0.16                       | 0.15 | 0.32 | -0.20        | 0.19 | 0.33 |
|                  |          | grand fir       | 18.11                                        | 9.23     | 10.81        | 5.55     | -0.11                       | 0.14 | 0.34 | -0.06        | 0.18 | 0.43 |
| $T_{max}$        | °C       | western juniper | 72.05                                        | 3.6      | 61.17        | 1.80     | -0.33                       | 0.13 | 0.10 | -0.36        | 0.18 | 0.12 |
|                  |          | ponderosa pine  | 35.21                                        | 4.55     | 29.00        | 2.76     | -0.2                        | 0.16 | 0.26 | -0.24        | 0.20 | 0.27 |
|                  |          | grand fir       | 19.55                                        | 5.16     | 12.10        | 5.50     | -0.14                       | 0.14 | 0.32 | -0.12        | 0.19 | 0.41 |
| $T_{min}$        | °C       | western juniper | 6.76                                         | 49.91    | 4.56         | 42.24    | 0.26                        | 0.14 | 0.16 | 0.32         | 0.19 | 0.18 |
|                  |          | ponderosa pine  | 9.48                                         | 12.69    | 7.20         | 13.50    | 0.06                        | 0.14 | 0.43 | 0.14         | 0.20 | 0.40 |
|                  |          | grand fir       | 10.5                                         | 12.64    | 7.07         | 9.90     | 0.04                        | 0.14 | 0.40 | 0.10         | 0.19 | 0.44 |
| VPD              | kPa      | western juniper | 87.45                                        | 3.75     | 78.68        | 3.64     | -0.41                       | 0.15 | 0.07 | -0.45        | 0.19 | 0.08 |
|                  |          | ponderosa pine  | 46.68                                        | 4        | 37.33        | 2.22     | -0.23                       | 0.17 | 0.23 | -0.26        | 0.20 | 0.25 |
|                  |          | grand fir       | 29.41                                        | 4.06     | 18.39        | 4.82     | -0.18                       | 0.15 | 0.28 | -0.16        | 0.21 | 0.35 |
| Freeze           | days     | western juniper | 45.79                                        | 4.33     | 40.36        | 2.75     | -0.25                       | 0.13 | 0.16 | -0.32        | 0.18 | 0.18 |
|                  |          | ponderosa pine  | 14.28                                        | 9.1      | 14.20        | 6.86     | -0.07                       | 0.15 | 0.41 | -0.14        | 0.20 | 0.39 |
|                  |          | grand fir       | 12.67                                        | 14.9     | 8.86         | 8.91     | 0.03                        | 0.14 | 0.39 | -0.08        | 0.19 | 0.45 |
| CMI              | mm       | western juniper | 2.62                                         | 90.59    | 2.09         | 89.24    | 0.52                        | 0.18 | 0.05 | 0.56         | 0.20 | 0.05 |
|                  |          | ponderosa pine  | 4.14                                         | 50.86    | 2.00         | 39.84    | 0.27                        | 0.21 | 0.23 | 0.28         | 0.21 | 0.24 |
|                  |          | grand fir       | 6.86                                         | 11.62    | 6.25         | 9.84     | 0.11                        | 0.13 | 0.40 | 0.05         | 0.22 | 0.42 |
| Deficit          | mm       | western juniper | 89.24                                        | 3.56     | 87.95        | 1.58     | -0.46                       | 0.16 | 0.06 | -0.52        | 0.20 | 0.07 |
|                  |          | ponderosa pine  | 52.67                                        | 4        | 43.37        | 2.60     | -0.26                       | 0.17 | 0.19 | -0.30        | 0.20 | 0.21 |
|                  |          | grand fir       | 13                                           | 7.33     | 8.45         | 6.70     | -0.11                       | 0.13 | 0.39 | -0.11        | 0.19 | 0.41 |
| SPEI             | unitless | western juniper | 3.83                                         | 90.94    | 2.56         | 89.31    | 0.53                        | 0.18 | 0.05 | 0.57         | 0.20 | 0.05 |
|                  |          | ponderosa pine  | 4.44                                         | 51.38    | 2.14         | 40.94    | 0.25                        | 0.2  | 0.20 | 0.28         | 0.21 | 0.22 |
|                  |          | grand fir       | 5.86                                         | 10.6     | 6.31         | 8.78     | 0.11                        | 0.12 | 0.44 | 0.05         | 0.21 | 0.42 |

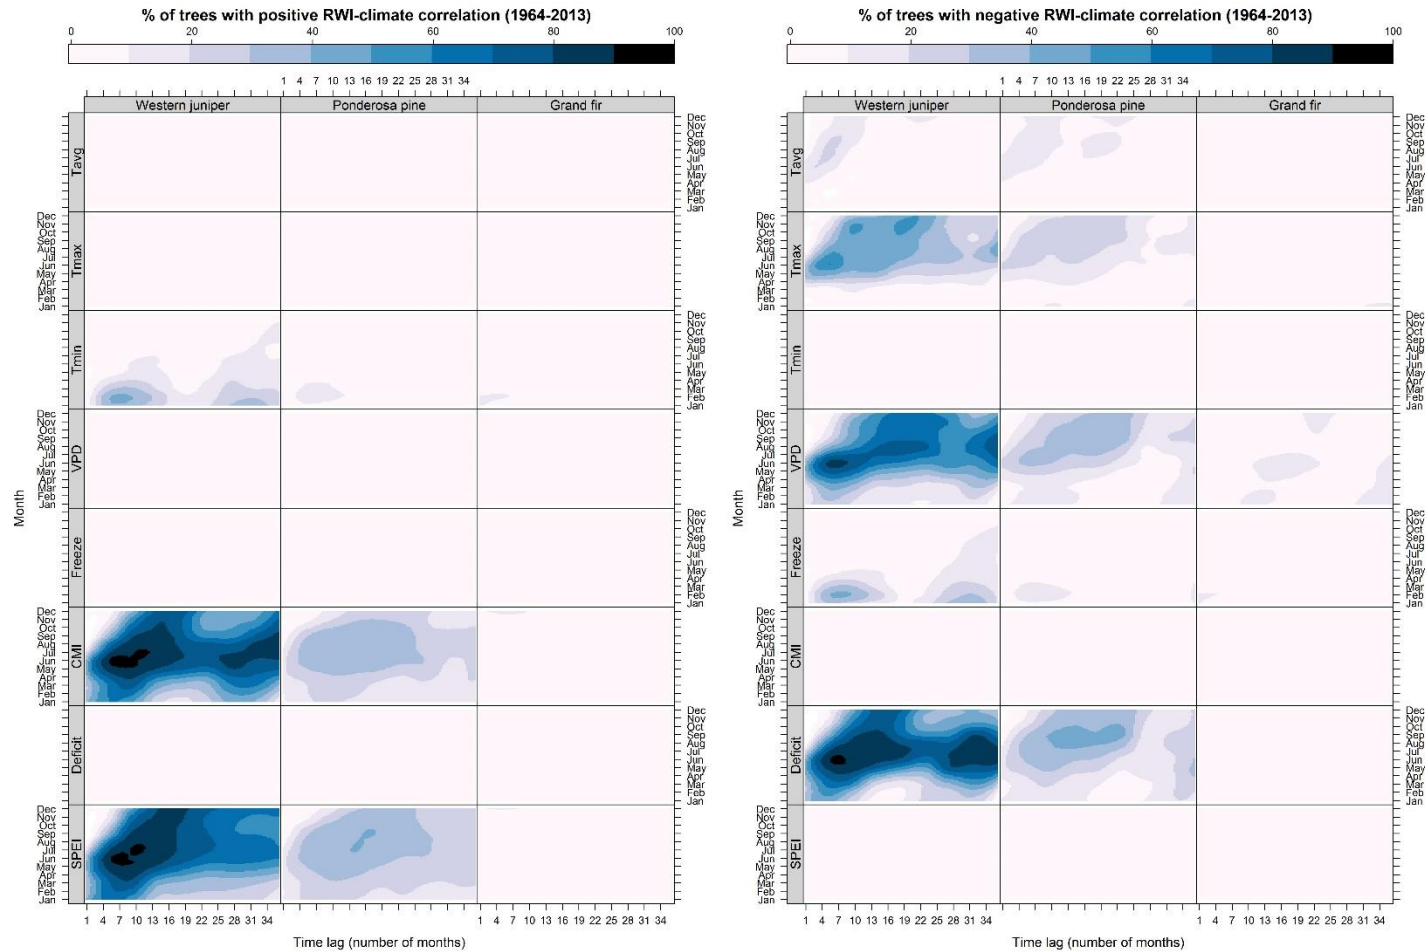

71

72 **Figure S1.** Proportion of trees with a significant positive (left panel) or negative (right panel) correlation between annual ring-width indices (RWI)  
 73 and a variety of climate variables calculated for each month at time lags extending from 1 to 36 months. Correlations were computed for each tree  
 74 (n=216) using growth and climate data from 1964 to 2013, with climate data averaged for temperature-related variables and summed for water-  
 75 related variables.

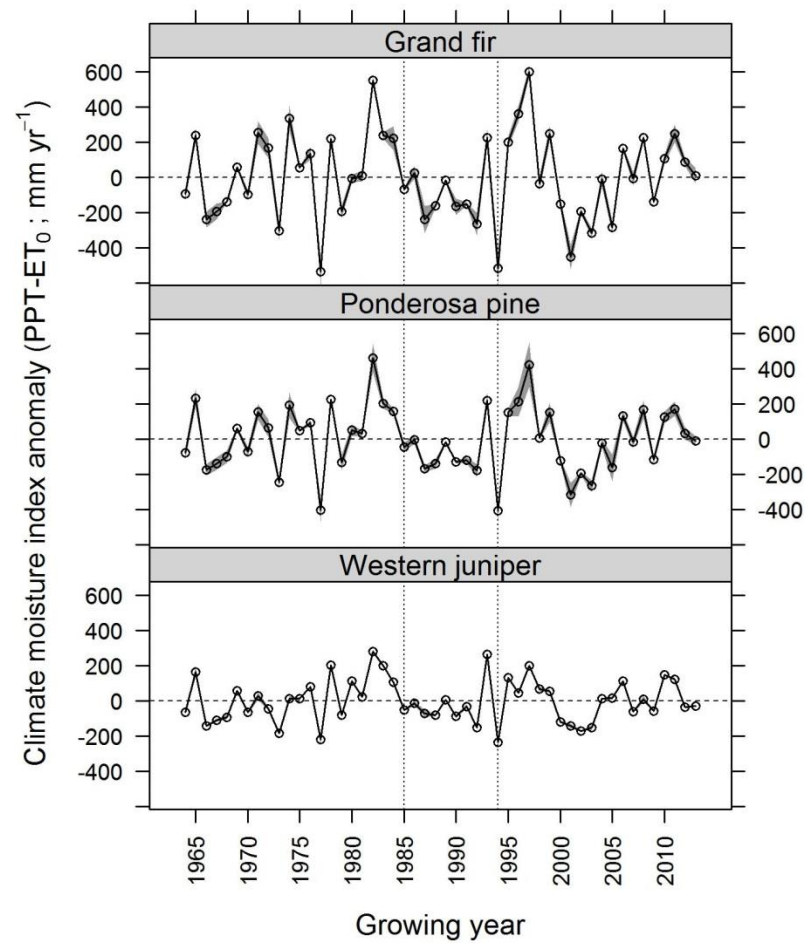

**Figure S2.** Growing-year climate moisture index anomalies from 1964 to 2013 for three forest types in the eastern Cascade Mountains, Oregon.
