# Supplementary material for: Water limitations on forest carbon cycling and conifer traits along a steep climatic gradient in the Cascade Mountains, Oregon
Source: Copernicus journal article supplement (doi:10.5194/bg-12-6617-2015), 2015-11-19
Supplement: Supplementary file 3 [file bg-12-6617-2015-supplement.zip]

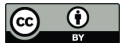

## *Supplement of*

# **Water limitations on forest carbon cycling and conifer traits along a steep climatic gradient in the Cascade Mountains, Oregon**

**L. T. Berner and B. E. Law**

*Correspondence to:* L. T. Berner (logan.berner@oregonstate.edu)

- bg-12-6617-2015-supplement-title-page.pdf
- BernerLaw\_2015\_BG\_supplemental.pdf
- BernerLaw\_2015\_Code\_and\_Data
  - code
    - \* calc\_1\_stem\_sg\_sap.R
    - \* calc\_2\_all\_stem\_agb\_npp\_sap\_v2.R
    - \* calc\_3\_site\_agb\_npp\_sap\_v2.R
    - \* calc\_ba.R
    - \* calc\_lai.R
    - \* calc\_sla\_chem.R
    - \* clim\_compare\_pet\_to\_flux\_et.R
    - \* clim\_extract.R
    - \* clim\_stats\_v2.R
    - \* fig\_2\_cmigy\_rw\_timeseries.R
    - \* fig\_3\_site\_c\_npp\_lai\_by\_cmigy.R
    - \* fig\_4\_rw\_cmi\_cor\_frac\_sp.R
    - \* fig\_5\_rw\_cmi\_cor\_by\_cmigy.R
    - \* fig\_6\_traits\_by\_cmi.R
    - \* fig\_S1\_rw\_climate\_cor\_frac\_sp.R
    - \* fig\_S2\_cmigy\_anom.R
    - \* fun\_fit\_models.R
    - \* model\_forestC\_by\_cmi.R
    - \* model\_forestCtraits\_by\_clim.R
    - \* site\_stats\_v2.R
    - \* trait\_summary\_v2.R
    - \* treering\_clim\_analysis\_v2.R
    - \* treering\_compile.R

- \* treering\_prep.R
- \* treering\_process\_v2.R
- \* treering\_summary.R
- data
  - \* eddy\_tower\_monthly\_data\_Me2Me6.csv
  - \* leaf\_traits
  - \* plot\_details
  - \* plot\_summaries
  - \* species\_summaries
  - \* stem\_survey
  - \* stem\_traits
  - \* subplot\_summaries
  - \* treerings

The copyright of individual parts of the supplement might differ from the CC BY 3.0 License.
