# Supplementary figures and images for: Water limitations on forest carbon cycling and conifer traits along a steep climatic gradient in the Cascade Mountains, Oregon
Source: Copernicus journal article supplement (doi:10.5194/bg-12-6617-2015), 2015-11-19

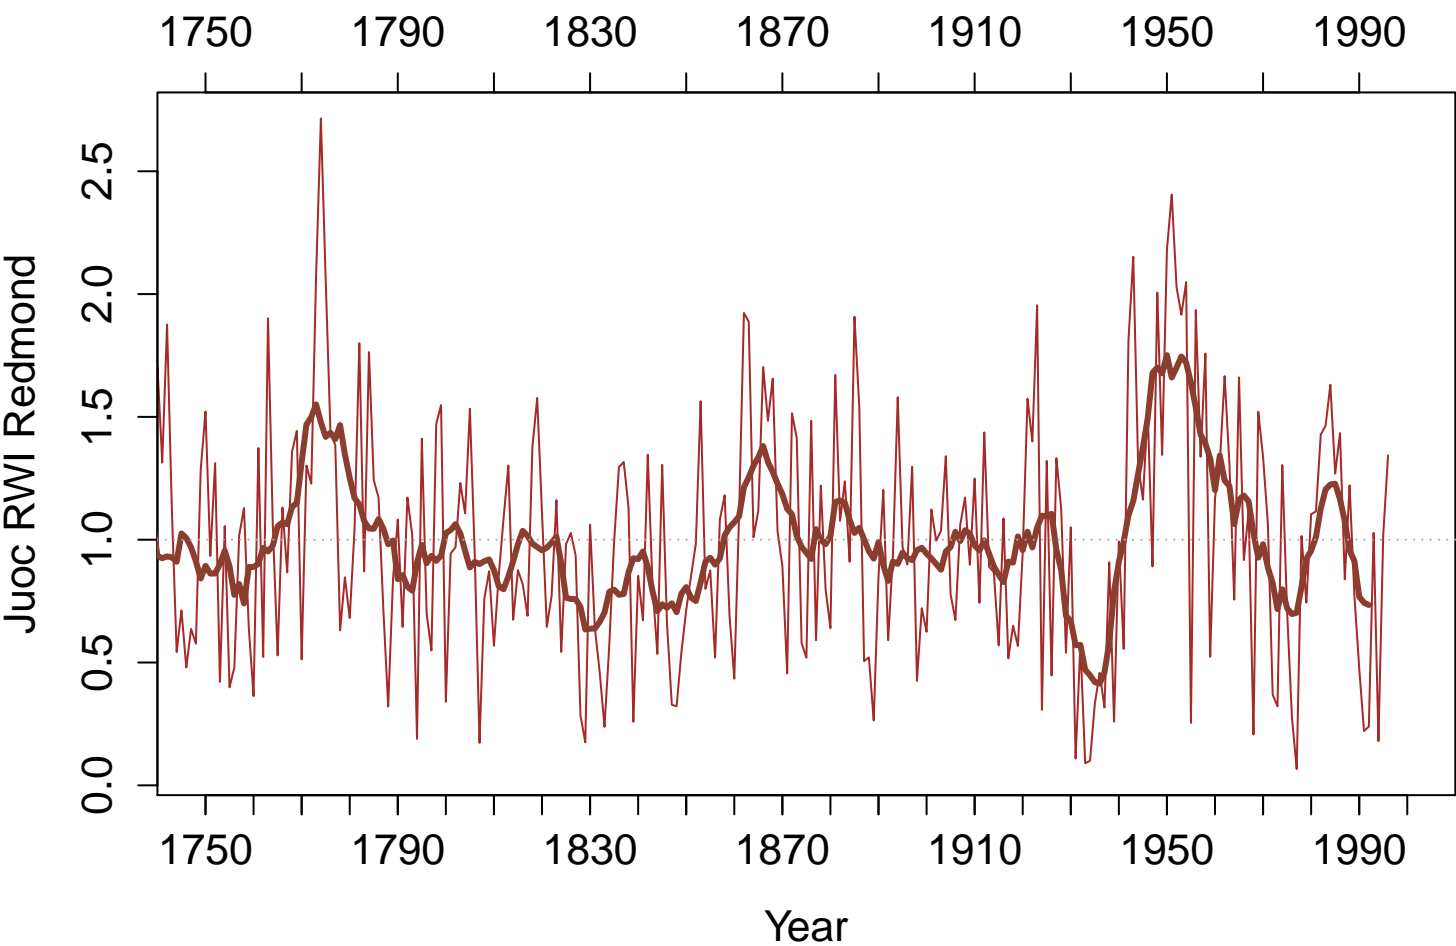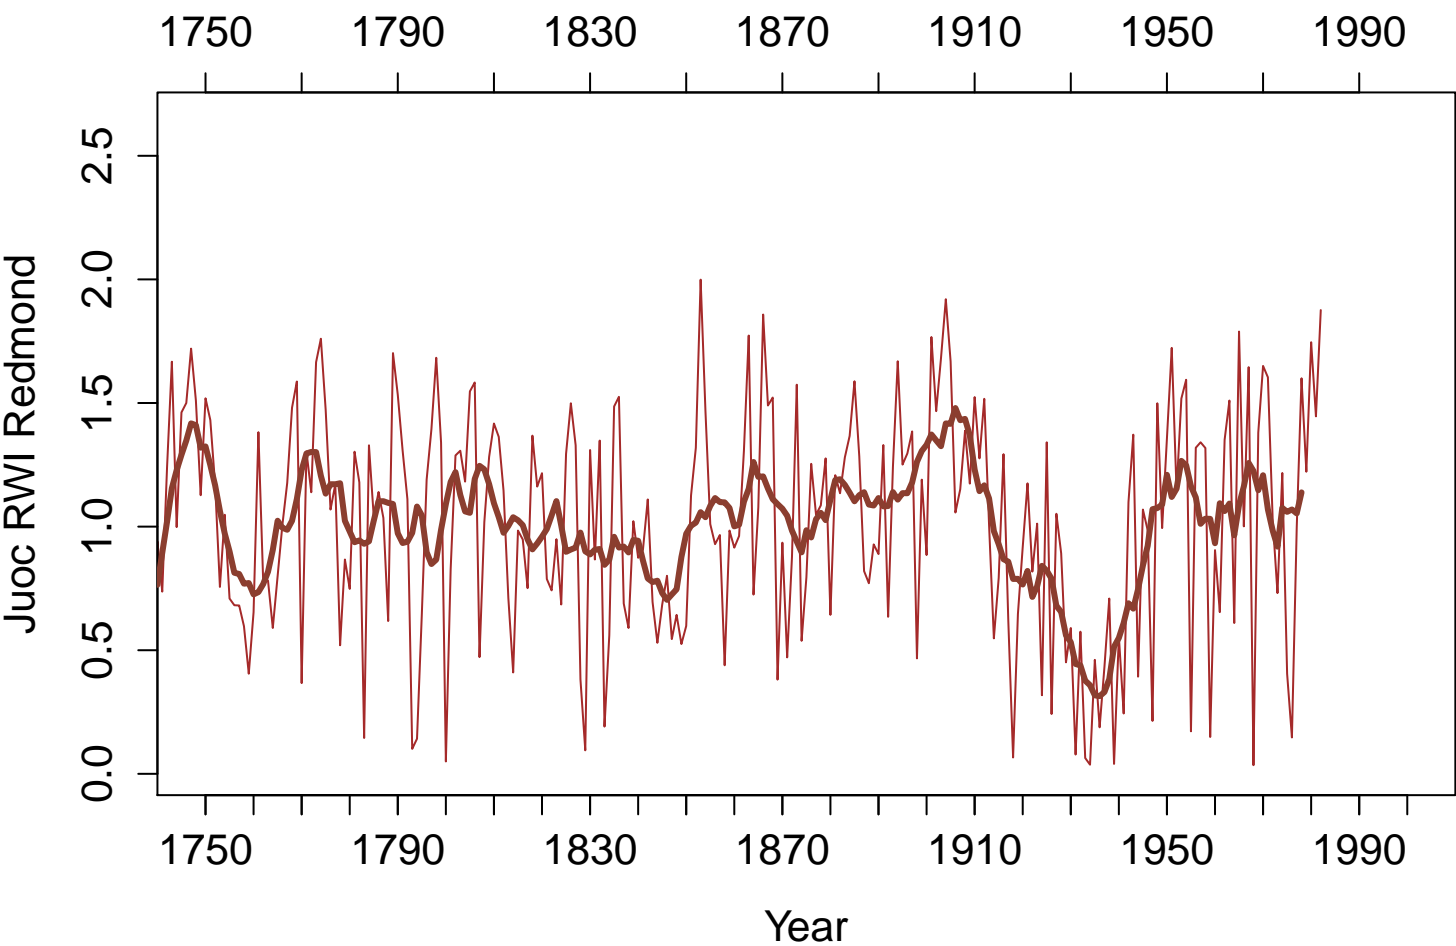

Supplement: Supplementary file 1 [file bg-12-6617-2015-supplement.zip]
